# Supplementary material
Source: Springer Nature journal article supplement (https://www.springermedizin.de/resource/supplementary/13054_2012_966_MOESM2_ESM.pdf/9709700)
Supplement: MOESM2 [file 9709700]

474 patients were eligible

80 no informed consent  
152 patients excluded

- 28 renal transplant
- 29 stem cell transplant
- 77 chronic steroid use
- 8 skin disease
- 5 pregnant
- 5 imminent death

242 included

133 randomized to honey

109 randomized to conventional dressing

4 no evaluable data

3 no evaluable data

129 evaluated

106 evaluated
